# Supplementary material for: Analysis of Carica papaya Informs Lineage-Specific Evolution of the Aquaporin (AQP) Family in Brassicales
Source: MDPI journal article supplement (doi:10.3390/plants12223847), 2023-11-03
Supplement: s1 [file s1]

**File S1 Alignment of CpAQPs with structure determined SoPIP2;1, AtTIP2;1, and OsNIP2;1.** Multiple sequence alignment was performed using MUSCLE. Transmembrane helices (TM1–TM6) and the two short helices forming the two NPAs (HB and HE) (**shaded**), NPA motifs (shown in **red**), and ar/R selectivity filter residues (shown in **green**) are indicated. The highly conserved cysteine residues in XIPs are shown in **bold**. The residues at the position corresponding to S<sup>115</sup> and S<sup>274</sup> in SoPIP2;1 (PDB accession number 1Z98) are highlighted in **bright green**, whereas the residues at the position corresponding to L<sup>197</sup> from SoPIP2;1, determined to be the key residue involved in gating (occurring just before TM5) are underlined. The residues at the position corresponding to H<sup>131</sup> in AtTIP2;1 (PDB accession number 5I32) are shown in **yellow**. The residues at the position corresponding to T<sup>109</sup> in OsNIP2;1 (PDB accession number 7CJS) are shown in **pink**. The residues at the position corresponding to S<sup>262</sup> in GmNOD26 (Genbank accession number P08995) are shown in **dark green**. “\*”, “:”, and “.” indicate consensus, strongly similar, and weakly similar amino acids, respectively.

|          |                                                                    |
|----------|--------------------------------------------------------------------|
| SoPIP2;1 | -----MS--KEVSEEAQAHQH GKDYVDPPPAPFFDLGELKL-----                    |
| AtTIP2;1 | -----MAGVAFGS-FDDSF-----                                           |
| OsNIP2;1 | -----MASNNSRTNSRANYSNEI HDLSTVQNGTMPTMYGKAIAD-----                 |
| CpPIP1;1 | MEGKEEDVKLGANKF SERQPIGTAAQTD---KDYKEPPPAPLFEPGELKS-----           |
| CpPIP1;2 | MEGKEEDVKLGANKF SERQPIGTSAQTD---KDYKEPPPAPLFEPGELHS-----           |
| CpPIP1;3 | MEGKEEDVRLGANKY SERQPIGTAAQSQDGGKDYKEPPPAPLFEPGELTS-----           |
| CpPIP1;4 | MEGKEEDVRLGANRYRERQPIGTAAQTQD-AKDYTEPPPAPLIEPGELFS-----            |
| CpPIP2;1 | -----MA--KDIE--VGGEFQAKDYHDPPPAPLIDPEELTK-----                     |
| CpPIP2;2 | -----MT--KDVEVAEQGEFS AKDYHDPPPAPLIDVEELTK-----                    |
| CpPIP2;3 | -----MT--KDAG--EHGSFS AKDYHDPPPAPLIDFAVELTK-----                   |
| CpPIP2;4 | -----MS--KEVSEEGQS--HGKDYVDPPPAPLIDLAEIKL-----                     |
| CpPIP2;5 | -----MSGGEGNEQTVGAEIRGRDYEDPPPASLIDMEELKK-----                     |
| CpTIP1;1 | -----MPIRNIAIGR-PEEATH-----                                        |
| CpTIP1;2 | -----MPISQIAIGS-PAEIR-----                                         |
| CpTIP1;3 | -----MPIYRVAIGA-PRELSH-----                                        |
| CpTIP2;1 | -----MACIAFGR-FDDIYS-----                                          |
| CpTIP6;1 | -----MVKIALGS-FGDSFS-----                                          |
| CpTIP3;1 | -----MPVRRYAFGR-VEEVTH-----                                        |
| CpTIP4;1 | -----MAKIALGT-RHEVTK-----                                          |
| CpTIP5;1 | -----MAPASLTSRFGQSIT-----                                          |
| CpNIP1;1 | -----MAEISMNSANNRVLNVNDGDVGHNSLPASTSESLEKRDSAL-----                |
| CpNIP2;1 | -----MAG--TLTHPNLNNQTDINDLVSVES-PISDRSSIWKSFEH-----                |
| CpNIP4;1 | -----MASKNDSIEEVPPDVEEEGTATSTNRLEPTSKNSSN-----                     |
| CpNIP8;1 | -----MSHQDYEVSKVEEGEA-----CSRSSSRIPESST-----                       |
| CpNIP5;1 | -----MPESETGTPTASAPATPGTPGGPLISGLRVDLSL---YDRKSMAR-CKCLPVTAP-----  |
| CpNIP6;1 | -----MDQKEDVPSAPSTPATPGTPGAPLFGGFRFRERSSSGFFRSKSLINTCNCFTLRDW----- |
| CpNIP7;1 | -----MKIKNFLNPQSSPDDQNTNGFINTTIFPLHCLSLQM-----                     |
| CpXIP1;1 | -----MESVIVSSDRSTHSAL-----STSIENYDKTSPTRISKNSFLASIG-----           |
| CpXIP2;1 | -MARNGGAIVVEDEENPYSATRIQPVASTPMAQQRNTEKGKKKTPTTLTGVLG-----         |
| CpSIP1;1 | -----                                                              |
| CpSIP3;1 | -----                                                              |
| CpSIP2;1 | -----                                                              |

# TMI

|          |                                                          |
|----------|----------------------------------------------------------|
| SoPIP2;1 | -----WSFWRAAIAEFIAITLLFLYITVATVIGHSKETV-----V            |
| AtTIP2;1 | -----LASLRAYLAEFISTLLFVFAGVGSIAIAYAKLTSDA-----A          |
| OsNIP2;1 | -----FFPPHLLKKVVSEVVATFLLVFMTCGAAGISGSDLS-----           |
| CpPIP1;1 | -----WSFYRAGIAEFIAITFLFLYITILTVMGVKRSDS-----M            |
| CpPIP1;2 | -----WSFWRAGIAEFMATFLFLYITVLTVMGVNRPAN-----K             |
| CpPIP1;3 | -----WSFYRAGIAEFMATFLFLYITVLTVMGVVKESS-----K             |
| CpPIP1;4 | -----WSFYRAGIAEFVATFLFLYITVLTVMGVVKSPT-----K             |
| CpPIP2;1 | -----WSFYRALTAEFVATLLFLYITVLTVIGYKSQTD-KNQGGDD           |
| CpPIP2;2 | -----WSFYRALIAEFVATLLFLYVTVLTVIGHKSQTDLTKAGTDV           |
| CpPIP2;3 | -----WSFYRALIAEFIAITLLFLYVTVLTVIGHKSQH-----AADQ          |
| CpPIP2;4 | -----WSFYRALIAEFIAITLLFLYVTIATVIGHKKQAG-----P            |
| CpPIP2;5 | -----WSFYRAVIAEFVATFLFLYVGIATVIGNKKQIH-----P             |
| CpTIP1;1 | -----PDALKAALAEFISMLIFVFAGEGSGMAFNKLTNNG-----A           |
| CpTIP1;2 | -----PDALKAALAEFISMLIFVFAGEGSGMAFNKLTNYG-----S           |
| CpTIP1;3 | -----PSAIRAALAEFFSMVIFVFAGEGSGMAFDKLTNNG-----S           |
| CpTIP2;1 | -----LASLKAYLAEFISTLLFVFAGVGSAMAFNKLTSDA-----P           |
| CpTIP6;1 | -----VGSLKAYLSEFIATLLFVFAGVGSIAIAFGKVTSDG-----A          |
| CpTIP3;1 | -----PDSIRATLAEFLSTLVFVFAGEGSVLALDKLYRETG-GDVS           |
| CpTIP4;1 | -----PDCIRALVVEFITTTFLFVFTGVGSAMAADRLVGNG-----           |
| CpTIP5;1 | -----KNAFRSYLAEFISTFFYVLTVVGSSMSARKLMGSG-----A           |
| CpNIP1;1 | -----SFSVPFIQKLMAEFFGTFFLIFAGCASVAVNDEYEK-----           |
| CpNIP2;1 | -----HYPPCFLRKVAAEVIATYLLVFVTCGSAAISAIDES-----           |
| CpNIP4;1 | -----LWAFTLAQKVIAELVGTYFIIIFSGCGAVAVNKIYG-----           |
| CpNIP8;1 | -----SWVVELLQKVIAEVLGTYFVMFSGCGSVVVNKIYG-----            |
| CpNIP5;1 | TWGQP--HTCFIDFPAPDVSLTRKLGAEFVGTFILIFAATAAPIVNQKYNG----- |
| CpNIP6;1 | SLEDPSVLPPVTCTLPHPVSLARKVGAFIGTLILIFAGTATAIVNQKSQG-----  |
| CpNIP7;1 | -----DFNPARAILAEMVGTFILVLCVCGIIASQQLMRG-----             |
| CpXIP1;1 | -----AHEFFSQEMWGAAITELVGTTCLLFTLTISIVACLNFE-----         |
| CpXIP2;1 | -----FKDLFSLKVWRASLAELLGTAVLVFAMDTIVISSYETQT-----        |
| CpSIP1;1 | -----MGPIKAAIGDMILTFMWNFFASTFGLMT--VMILGAAGLQG           |
| CpSIP3;1 | -----MGVIRSAIGDSVLTSMWVFNLPVIGLLAGRASDFLRTHYIS           |
| CpSIP2;1 | -----MAKIRLLISDFIVSFMWVWSGVLIKIFVHRVLGLGHEPRAE           |

: .

## TM2

|          |                                                               |
|----------|---------------------------------------------------------------|
| SoPIP2;1 | CGSVGLLGIAWAFGGMIFVLVYCTAGISGGHINPAVTFGLFLARKVSLLRALVYMIAQCL  |
| AtTIP2;1 | LDTPGLVAIAVCHGFALFVAVAIGANISGGHVNPAVTFGLAVGGQITVITGVFYWIAQLL  |
| OsNIP2;1 | --RISQLGQSIAGGLIVTVMYIYAVGHISGAHMNPAVTLAFAVFRHFPWIQVPFYWAAQFT |
| CpPIP1;1 | CASVGIQGIWAFFGGMIFALVYCTAGISGGHINPAVTFGLLLARKLSLTRAIFYMIMQCL  |
| CpPIP1;2 | CASVGIQGIWAFFGGMIFALVYCTAGISGGHINPAVTFGLFLARKLSLTRSIFYMVMQCL  |
| CpPIP1;3 | CSTVGIQGIWAFFGGMIFALVYCTAGISGGHINPAVTFGLLLARKLSLTRAIFYMVMQCL  |
| CpPIP1;4 | CSTVGIQGIWAFFGGMIFALVYCTAGISGGHINPAVTFGLLLARKLSLVRIFYMIMQCL   |
| CpPIP2;1 | RGGVGILGIAWAFGGMIFILVYCTAGISGGHINPAVTFGLFLARKVSLVRIFYMVAQCL   |
| CpPIP2;2 | CGGVGLLGIAWAFGGMIFILVYCTAGISGGHINPAVTLGLFLARKVSLIRAIMYMVAQCL  |
| CpPIP2;3 | CGGVGILGIAWAFGGMIFILVYCTAGISGGHINPAVTFGLFLARKVSLVRIFYMVAQCL   |
| CpPIP2;4 | CDGVGILGIAWAFGGMIFILVYCTAGISGGHINPAVTFGLFLARKVSLIRAVAYMVAQCL  |
| CpPIP2;5 | CDGVGLLGISWSFGGMIFILVYCTAGISGGHINPAVTLGLFAARKMSLIRAAAYMVSQCG  |
| CpTIP1;1 | ATPAGLIAAAIAHAFALFVAVAVGANISGGHVNPAVTFGAFVGGNISLLRGILYWIAQLL  |
| CpTIP1;2 | ATPAGLISASLAHAFALFVAVSVGANISGGHVNPAVTFGAFVGGHISLFRSVLYWIAQCL  |
| CpTIP1;3 | STPAGLVAAASLAHAFALFVAVSVGANISGGHVNPAVTFGAFVGGNITFFRSILYWIAQLL |
| CpTIP2;1 | LDPSGLVAIAVCHGFALFVAVAVAANISGGHVNPAVTLGLAVGGQITILTGFIFYWIAQLL |
| CpTIP6;1 | LDPAGLVAAIAVAHAFALFVGVAIAANISGGHLNPAVTLGLAIGGNITLLTGLFYWIAQCL |
| CpTIP3;1 | RDPSGLVLIALAHALSLSFSAVSASINISGGHVNPAVTFGALLGGRISVLRIFYWLAQCL  |
| CpTIP4;1 | --LLGLFAVAVAHALVVAVMISAG-HISGGHLNPAVTLGLLFGGHITLVRISILYWIDQCL |
| CpTIP5;1 | EDPSGLVIVAIAANSLGLSYTVYVASNISGGHVNPAVTFARAVGGHVSPTALFYWVSQML  |
| CpNIP1;1 | --VVTLPGISIVWGLAVMVLVYSVGHISGAHFNPAVTIAFASCRRFPLKQVPAYILVQCL  |
| CpNIP2;1 | --RVSKLAASVAGGLIVTVMYIYAVGHISGAHMNPAVTLAFAALRHFPWKQVPFYAAAQVT |
| CpNIP4;1 | --SVTFPGICVTWGLIVTVMYITVGHVSGAHFNPAVTIAFTIFQKFPSEVLIFYIVAQFL  |
| CpNIP8;1 | --SVTFPGICVWGLIVMVMVYSVGHISGAHFNPAVTITFAIFRRFPFKQVPLYILAQCL   |
| CpNIP5;1 | --AETLIGNAACSGLAVMIIILSTGHISGAHLNPSVTICFAALRHFPWAQVPAYIAAQIS  |
| CpNIP6;1 | --SETLIGLAASTGLAVMIVILSTGHISGAHLNPAVTISFAALHHFPWKHVPAYIAAQTV  |
| CpNIP7;1 | --EVGLMEYAATAGLTVVVVIFCIGPISGAHVNPAVTIAFAIFGHFSWSRVPFYILAQML  |
| CpXIP1;1 | --VESKLLVPIVVFVILFFFLMATIPISGGHMNPVFTFIATLKGIIITITRAAFYFLAQCL |
| CpXIP2;1 | --KTPHLIMSFLVAITVTILLLATSPIISGGHINPIVTVAAVLTGLISVSRAIVYILAQCI |
| CpSIP1;1 | VAWAPVLITILLVFIFVFIFGLIGDALGGASFNPTGTAAFYAAGVG--SDSLLSMAIRFP  |
| CpSIP3;1 | LPFTGLFITILLATINVLFLTLLGTLGGASFNPTTTSFHAAGLTKPGSSSLISMAVRLP   |
| CpSIP2;1 | IIRG-----AMAIIVNMFFFAFLGKVGKGASYNPLTVLAPAVSGDF--SSFLFSLGCRIP  |

:

\*. \*\* .

:

|          |                                    | HB             | TM3             |
|----------|------------------------------------|----------------|-----------------|
| SoPIP2;1 | CGSVGLLGIAWAFGGMIFVLVYCTAGISGGHIN  | PAVTFGLFLARKV  | SLLRALVYMIAQCL  |
| AtTIP2;1 | LDTPGLVAIAVCHGFALFVAVAIGANISGGHVN  | PAVTFGLAVGGQI  | TVITGVFYWIAQLL  |
| OsNIP2;1 | --RISQLGQSIAGGLIVTVMIIYAVGHISGAHMN | PAVTLAFAVFRHFP | WIQVPFYWAAQFT   |
| CpPIP1;1 | CASVGIQGIAWAFGGMIFALVYCTAGISGGHIN  | PAVTFGLLLARKL  | SLTRAVFYMIMQCL  |
| CpPIP1;2 | CASVGIQGIAWAFGGMIFALVYCTAGISGGHIN  | PAVTFGLFLARKL  | SLTRSFYVMVMQCL  |
| CpPIP1;3 | CSTVGIQGIAWAFGGMIFALVYCTAGISGGHIN  | PAVTFGLLLARKL  | SLTRAIFYMVMQCL  |
| CpPIP1;4 | CSTVGIQGIAWAFGGMIFALVYCTAGISGGHIN  | PAVTFGLLLARKL  | SLVRAV FYMIMQCL |
| CpPIP2;1 | RGGVGILGIAWAFGGMIFILVYCTAGISGGHIN  | PAVTFGLFLARKV  | SLVRAVLYMVAQCL  |
| CpPIP2;2 | CGGVGILGIAWAFGGMIFILVYCTAGISGGHIN  | PAVTFGLFLARKV  | SLIRAIMY MVAQCL |
| CpPIP2;3 | CGGVGILGIAWAFGGMIFILVYCTAGISGGHIN  | PAVTFGLFLARKV  | SLVRAVMYMVAQCL  |
| CpPIP2;4 | CDGVGILGIAWAFGGMIFILVYCTAGISGGHIN  | PAVTFGLFLARKV  | SLIRAVAYMVAQCL  |
| CpPIP2;5 | CDGVGLLGISWSFGGMIFILVYCTAGISGGHIN  | PAVTLGLFAARKM  | SLIRAAAYMVSQCG  |
| CpTIP1;1 | ATPAGLIAAAIAHAFALFVAVAVGANISGGHVN  | PAVTFGAFVGGNI  | SLLRGILYWIAQLL  |
| CpTIP1;2 | ATPAGLISASLAHAFALFVAVSVGANISGGHVN  | PAVTFGAFVGGHI  | SLFRSVLYWIAQCL  |
| CpTIP1;3 | STPAGLVAASLAHAFALFVAVSVGANISGGHVN  | PAVTFGAFVGGNI  | TFFRSILYWIAQLL  |
| CpTIP2;1 | LDPSGLVAIAVCHGFALFVAVAVAANISGGHVN  | PAVTLGLAVGGQI  | TILTGFIFYWIAQLL |
| CpTIP6;1 | LDPAGLVAIAVAHAFALFVGVAIAANISGGHLN  | PAVTLGLAIGGNI  | TLLTGLFYWIAQCL  |
| CpTIP3;1 | RDPSGLVLIALAHALSLSAVSASINISGGHVN   | PAVTFGALLGGRI  | SVLRAFYYWLAQLL  |
| CpTIP4;1 | --LLGLFAVAVAHALVVAVMISAG-HISGGHLN  | PAVTLGLLFGGHI  | TLVRSILYWIDQLL  |
| CpTIP5;1 | EDPSGLVIVAIANSLSYTVYVASNISGGHVN    | PAVTFARAVGGHV  | SVPTALFYWVSQML  |
| CpNIP1;1 | --VVTLPGISIVWGLAVMVLVYSVGHISGAHFN  | PAVTIAFASCRRF  | PLKQVPAYILVQLL  |
| CpNIP2;1 | --RVSKLAASVAGGLIVTVMIIYAVGHISGAHMN | PAVTLAFAALRHFP | PKQVPFYAAAQVT   |
| CpNIP4;1 | --SVTFPGICVTWGLIVTVMIIYTVGHVSGAHFN | PAVTIAFTIFQKFP | PSEVLFIYIVAQFL  |
| CpNIP8;1 | --SVTFPGICVWGLIVMVMVYSVGHISGAHFN   | PAVTITFAIFRRFP | PKQVPLYILAQLL   |
| CpNIP5;1 | --AETLIGNAACSGLAVMIIILSTGHISGAHLN  | PSVTICFAALRHFP | WAQVPAYIAAQIS   |
| CpNIP6;1 | --SETLIGLAASTGLAVMIVILSTGHISGAHLN  | PAVTISFAALHHFP | WKHVPAYIAAQTV   |
| CpNIP7;1 | --EVGLMEYAATAGLTVVVVIFCIGPISGAHVN  | PAVTIAFAIFGHF  | SWSRVPFYILAQML  |
| CpXIP1;1 | --VESKLLVPIVVVFVILFFFLMATIPISGGHMN | PVFTFIATLKGII  | TITRAAFYFLAQCL  |
| CpXIP2;1 | --KTPHLIMSFLVAITVTILLLATSPISGGHIN  | PIVTVAAVLTGLI  | SVSRAIVYILAQCI  |
| CpSIP1;1 | VAWAPVLITTLLVFIFVFIFGLIGDALGGASFNP | TGTAIFYAAGVG   | --SDSLLSMAIRFP  |
| CpSIP3;1 | LPFTGLFITILLATINVLLFTLLGTLGASFN    | PSTTVSFHAAGLTK | PGSSSLISMAVRLP  |
| CpSIP2;1 | IIRG-----AMAIVNMFFFAFLGKVGKGASYN   | PLTVLAPAVSGDF  | --SSFLFSLGCRIP  |
|          | :                                  | *. ** .        | :               |

# TM4

|          |                                                            |
|----------|------------------------------------------------------------|
| SoPIP2;1 | GAICGVGLVKAFM-KGPYNQFGGG-----ANSVALGYNKGTALGAEIIGTFVLV     |
| AtTIP2;1 | GSTAACFLLKYVTGGLAVPTHS-----VAAGLGSIEGVVMEIITFALV           |
| OsNIP2;1 | GAICASFVLKAVIHP-VDVIGT-----TTPVGPHW--HSLVVEVIVTFNMM        |
| CpPIP1;1 | GAICGAGVVKGFQ-PGPYQRLGGG-----ANVVNHGYTKGDGLGAEIVGTFVLV     |
| CpPIP1;2 | GAICGAGVVKGFQ-PRPYQMLGGG-----ANMVNHGYTKGDGLGAEIVGTFVLV     |
| CpPIP1;3 | GAICGAGVVKGFEGSATFELKGGG-----ANVVNHGYTKGDGLGAEIVGTFVLV     |
| CpPIP1;4 | GAICGAGVVKAFF-KTQYEMLGGG-----ANTVGPAYSKTAGLGAEIVGTFVLV     |
| CpPIP2;1 | GAICGCVGLVKAFQ-KACYNRYGGG-----ANQLALGYSTGTGLGAEIIGTFVLV    |
| CpPIP2;2 | GAICGCVGLVKAFQ-SSFYNYRGGG-----ANSLNGGYNKGTGLGAEIIGTFVLV    |
| CpPIP2;3 | GAICGCVGLVKAFQ-KSFYNYRFGG-----ANTLADGYNVGTGLGAEIIGTFVLV    |
| CpPIP2;4 | GAICGCVGLVKAFM-KNYYNRLGGG-----ANTVATGYNTGTALGAEIIGTFVLV    |
| CpPIP2;5 | GAICGCVGLVKLFM-TRSYNMHGGG-----ANSVAPGFSTTTGLGAEIIGSFVLV    |
| CpTIP1;1 | GSVAACALLKFATGGLTTSFAFA-----LSSGVGVWNAFVFEIVMTFGLV         |
| CpTIP1;2 | GSVLACLLLKFSTGGLETSAFA-----LSSGVGELNALVFEIVMTFGLV          |
| CpTIP1;3 | GSVVACLLLKFATGNMETAFAFG-----LSSGVSPMNALVFEIVMTFGLV         |
| CpTIP2;1 | GSIVACFLLKAVTGCAIPIHS-----VAAEVGVIGGLVMEIITFALV            |
| CpTIP6;1 | GSIVACGLLKFTV-DLSVPTHS-----VGSVGSVLEGVVMEIVITFALV          |
| CpTIP3;1 | GAIVACLLLRLVTAGMRPVGFR-----VASGVGELNGLVLEMLVLTFGML         |
| CpTIP4;1 | ASSIACILLKYLTGGLDTPIHT-----LASGVGYGQGVVWEIVLTFSL           |
| CpTIP5;1 | ASVMASLILRVMTVAQHVPTYA-----IAEQMTGFGASVLEGVLTFAV           |
| CpNIP1;1 | GSTLAAGTLRLLFNGQHVFVTG-----TAPSGSDM--QSFGEIETITFYLM        |
| CpNIP2;1 | GAISAAFTLRVLLHP-IKLIGT-----TSPAGSDI--QALIMEIVVTFSM         |
| CpNIP4;1 | GSILASGTLALMFDITPNAYFG-----TTPVGSNG--QSLAIEIITFLLT         |
| CpNIP8;1 | GAILASYTLWIIHFVNESFFG-----TVPVGSDL--QSLWIEIISFILM          |
| CpNIP5;1 | ASICASFTLKGVFHP-FLSGGV-----TVPSVSLG--QAFLEFLISFILL         |
| CpNIP6;1 | GSLCAAFALKIVFHP-MMGGGV-----TVPSVSVGYAQAFLEFIISFNLM         |
| CpNIP7;1 | GSTLATWAGRSVYGVRADLMAT-----RPVQGCFA---AFWVEFFGTFIIM        |
| CpXIP1;1 | GSIIISFIIKSVMNHSATKFSLGGCSIKGHGS-----TGLHLGVALMLEFSCTFLVL  |
| CpXIP2;1 | GGILGALALKAVVNSTIQQTFSLGGCTLTVVVPGRHGPVIGLETGQALWLEICTFVFL |
| CpSIP1;1 | AQAVGAVGGALAITVEMPIQYKHM-----IGGPSLKVELHTGAVAEGILTFLIT     |
| CpSIP3;1 | AQAAGGAIGAMGIWQVMPVG--WL-----KGGPSLKVDWHTGALAEGLLAFAHC     |
| CpSIP2;1 | VQVIGSIVGVRFIETIPEAG-----LGPRLKVDIHQALTEGFLTFAIV           |

. . \* :\*

|          | <u>TM5</u>                                                   | <u>HE</u> |
|----------|--------------------------------------------------------------|-----------|
| SoPIP2;1 | YTVFSATDPKRSARDS---HVPILAPLPIGFAVFMVHLATIP--ITGTGINPARSFGAAV |           |
| AtTIP2;1 | YTVYATAADPKKG-----SLGTIAPLAIGLIVGANILAAGP--FSGGSMNPARSFGPAV  |           |
| OsNIP2;1 | FVTLAVATDTRAVG-----ELAGLAVGSAVCITISIFAGA--ISGGSMNPARTLGPAL   |           |
| CpPIP1;1 | YTVFSATDAKRNARDS---HVPILAPLPIGFAVFLVHLATIP--ITGTGINPARSLGAAI |           |
| CpPIP1;2 | YTVFSATDAKRNARDS---HVPILAPLPIGFAVFLVHLATIP--ITGTGINPARSLGAAI |           |
| CpPIP1;3 | YTVLSATDAKRNARDS---HVPILAPLPIGFAVFLVHLATIP--ITGTGINPARSLGAAI |           |
| CpPIP1;4 | YTVFSATDAKRNARDS---HVPILAPLPIGFAVFLVHLATIP--VTGTGINPARSLGAAL |           |
| CpPIP2;1 | YTVFSATDPKRNARDS---HVPVLAPLPIGFAVFMVHLATIP--VTGTGINPARSFGAAV |           |
| CpPIP2;2 | YTVFAATDPKRNARDS---HVPVWAPLPIGFAVFMVHLATIP--ITGTGINPARSFGAAV |           |
| CpPIP2;3 | YTVFSATDPKRSARDS---HVPVLAPLPIGFAVFMVHLATIP--VTGTGINPARSFGAAV |           |
| CpPIP2;4 | YTVFSATDPKRSARDS---HVPVLAPLPIGFAVFMVHLATIP--ITGTGINPARSFGAAV |           |
| CpPIP2;5 | YTVFSATDPKRSARES---FIPVLAPLPIGLAVFMVHLATIP--ITGTGINPARSLGAAV |           |
| CpTIP1;1 | YTVYATAVDPKKG-----SLGTIAPIAIGFIVGANILAGGA--FDGASMNPAVSFGPAV  |           |
| CpTIP1;2 | YTVYATAIDPKRG-----NIGIIAPIAIGFIVGANILAGGA--FDGASMNPAVSFGPAV  |           |
| CpTIP1;3 | YTVYATAVDPKKG-----NLGTIAPIAIGFIVGANILAGGA--FDGASMNPAVSFGPAV  |           |
| CpTIP2;1 | YTVYATAADPRKG-----SLGTIAPIAIGFIVGANILAAGP--FSGGSMNPARSFGPAV  |           |
| CpTIP6;1 | YTVYATAADPKRG-----SLGIIAPIAIGFIVGANILAAGP--FSGGSMNPARSFGPAV  |           |
| CpTIP3;1 | YTVYATTIDPKRG-----SIGIIGPLAIGLIVGGNILVGGP--FDGGSMNPARAFGPAL  |           |
| CpTIP4;1 | FTVYATIVDPKKG-----SLDGLGPMLTGFFVVGANILAGGA--FSGASMNPARSFGPAL |           |
| CpTIP5;1 | YTIYAAG-DPRRG-----QMGAIGPLVIGMAAGANFLAAGP--FSGGSMNPAFAFGSAV  |           |
| CpNIP1;1 | FIISGVATDNRAIG-----ELAGLAVGATVLLNVMFAGP--ISGASMNPARSLGPAI    |           |
| CpNIP2;1 | FITSAVATDTKAVG-----ELAGIAVGSAVCITISILAGP--VSGGSMNPARSIGPAL   |           |
| CpNIP4;1 | FVIFGASIDERAIG-----QLGGIAVGMTVMLNVFVAGP--ISGASMNPARSLGPAF    |           |
| CpNIP8;1 | FVISGVATDNRAIG-----ELAGIAVGMTIILNVFVAGP--VSGASMNPARSIAPAI    |           |
| CpNIP5;1 | FVITAVATDTRAVG-----ELAGIAVGATVMLNILVAGP--SSGGSMNPVRTLGPAV    |           |
| CpNIP6;1 | FVVTAATDTRAVG-----ELAGIAVGATVMLNILIAGP--STGASMNPVRTLGPAL     |           |
| CpNIP7;1 | FLSAALICEAHTIG-----HLSGFVVGIAIGLAVLITGP--VSGGSMNPARSLGPAI    |           |
| CpXIP1;1 | FVAVNVAFDKRRSKELGVSKVCAQIAGAMALAVFVSITVTGQTAYAGAGLNPAKCFGAAI |           |
| CpXIP2;1 | FASIWVAFDYRQAKALGRFMVCLVIGVVVGLIVFVSTTVTATKGYAGVGMNPARCLGPAL |           |
| CpSIP1;1 | FAVLVIIILKGPRNS-----VLKTWLLAVATVALVLSGSA--YTGAMNPAIAFGWAY    |           |
| CpSIP3;1 | LSVLVVVVRGPRSV-----FVKVLLLAMVTTGLVRVSGS--YTGPSLNPANAFGWAY    |           |
| CpSIP2;1 | MISLGLAAKIPGSF-----FMKTIWISSVSKLALHILGSD--LTGCGMNPAVVMGWAF   |           |

\* : \*\* . : . \*

# TM6

|          |                                                               |
|----------|---------------------------------------------------------------|
| SoPIP2;1 | IFNSNKVWDDQWIFWVGPFFIGAAVAAAYHQYVLRAAAI-----KALGSFRSNPTN---   |
| AtTIP2;1 | AAGD---FSGHWVYVWGPLIGGGLAGLIYGNVFMGSSE-----HVPLASADF-----     |
| OsNIP2;1 | ASNK---FDGLWIYFLGPVMTLSGAWTYTFIRFEDTPKEGSSQKLSSFKLRLRSQQSI    |
| CpPIP1;1 | IFNTDHAWDDHWIFWVGPFFIGAALAAYHQIVIRAIPF-----KTRA-----          |
| CpPIP1;2 | IYNDDTAWDDHWVFWVGPFFIGAALAALYHQIVIRAIPF-----KTRG-----         |
| CpPIP1;3 | IFNRDKAWDDHWIFWVGPFFIGAALAALYQQVVIRAIPF-----KSK-----          |
| CpPIP1;4 | IYNKSQAWDDHWIFWVGPFFIGAALAALYHQIVIRAIPF-----RSK-----          |
| CpPIP2;1 | IFNQDKPWDDHWIFWVGPFFIGAAIAAFYHQYVLRASGS-----KSLGSLRSSNI---    |
| CpPIP2;2 | IFNDEKAWDDHWIFWVGPFFIGAAIAAIYHQYVLRAAAI-----KALGSFRSNA----    |
| CpPIP2;3 | IFNDKKAWDDHWIFWVGPFFIGAAIAAFYHQFILRAAAV-----KALGSFRSQSHV---   |
| CpPIP2;4 | IWNNKKGWDDHWIFWVGPFVFGALAAAAYHQYILRAAAI-----KALGSFRSNPTN---   |
| CpPIP2;5 | VYNNQQVWDEQWIFWVGPFVFGALAAAAYHEYVLRAAAV-----KALLSFRPH-----    |
| CpTIP1;1 | VSWS---WDNHWVYVWAGPLIGGGLAGLIYDFFFIHS-----HEQLPTADY-----      |
| CpTIP1;2 | VSWT---WNSHWVYVWGPFAGAGIAALVYEIIFIGSST-----HEQLASADF-----     |
| CpTIP1;3 | VSWT---WTHHWVYVWGPFFIGAAIAAIVYDNIFIGNDS-----HEPLPTNDF-----    |
| CpTIP2;1 | ASGN---FCGIWIYVWGPLVGGGLAGLIYGNIFISS-----HQSLPSCD-----        |
| CpTIP6;1 | VSGD---FTDNWVYWLGPLVGGALAGLVYGDIFIGSYS-----PVSASQDYP-----     |
| CpTIP3;1 | VGWR---WRNHWIYVWGPFVGGGLAALVYEFMVIPSTTEPPLITGHQPLAPEDY-----   |
| CpTIP4;1 | VSWD---WTDHWVYVWGPLMGGGLAGFMYENFFIVRS-----HVLVSHQDDSC----     |
| CpTIP5;1 | VAGS---FKNQAVYVWGPLIGATIGGLLYDNVVPPEAIDS----LTGISERPVV-----   |
| CpNIP1;1 | VFSR---YKGIWIYIFSPVLGAISGAWVYNMVRITDKPLREITKSSSFLKSARS CST--- |
| CpNIP2;1 | ASQY---YKGIWVYLVGPVTGTLLGAYSYNLIRVKDEPVQAISPRSFSFKLRRMKS-HEE  |
| CpNIP4;1 | VKHE---FKGLWIYVIGPVAGAIAGASAYSLVRAGDRP-----SETLSFLTGSSK--     |
| CpNIP8;1 | VMHV---YKGLWVYIVGPPIGTILGGAAYNLIRFTDKPLREITRTGSFLKSISR RN---- |
| CpNIP5;1 | AAGN---YKAIWVYLLAPILGGLVGAGTYTAVKLRDDEAE---PPRQVRSFRR-----    |
| CpNIP6;1 | AANN---YKAIWVYLIAPILGALSAGIYTAVKLPEEDADTHEKPSTARSFRR-----     |
| CpNIP7;1 | VSWD---FDNIWIYMIAPVVGAIAGVLLYQFLRLKHRPCTATSSPSTVSYLVTP-----   |
| CpXIP1;1 | LQGG-LLWKGHVFWVGSFFACIVYYGFSLTLPKQGLDWVEGEYDAMRLAKACWGTKDFP   |
| CpXIP2;1 | IRGG-HLWSGHWVFWAGPVIACVAFALYIKMIPREHFHGGD-----                |
| CpSIP1;1 | QNNWHNSWEHFYVYVICPFIGAIFAALVFRIIFPPTVEVK-----KKKQKKA-----     |
| CpSIP3;1 | VKNWHNSLELYYVYVWGPLVGATMAAWVFRVLFAPSLVK-----KKKKKKKRE-----    |
| CpSIP2;1 | ARGDHITKEHIFVYWLAPVEATLLAVWTFKLVTKSLTED-----KAKLKAKSE-----    |

:: . . .
